# Supplementary material
Source: PubMed Central journal article supplement (PMC5743090)
Supplement: 10.1074_M117.799908_jbc.M117.799908-1.pdf [file 10.1074_M117.799908_jbc.M117.799908-1.pdf]

**SUPPLEMENTARY FIGURE LEGENDS**

**SUPPLEMENTARY FIGURE 1.** Complete heat maps of gene expression. Fold changes represent the changes in gene expression with control human IgG (60 µg/ml), or anti-GRP78 AutoAbs treatment (60 µg/ml). (*left panel*) Both groups received enoxaparin treatment (6 mg/Kg/week). (*right panel*) No additional treatments were administered.

**SUPPELEMENTARY TABLE 1.** Primers for quantitative RT-PCR.

| <b>Human genes</b> | <b>Forward primers (5'-3')</b> | <b>Reverse primers (5'-3')</b> |
|--------------------|--------------------------------|--------------------------------|
| <i>ATF4</i>        | GGGACAGATTGGATGTTGGAGA         | ACCCAACAGGGCATCCAAGT           |
| <i>GRP78</i>       | CATCACGCCGTCCTATGTCG           | CGTCAAAGACCGTGTTCTCG           |
| <i>Ki67</i>        | GGGCCAATCCTGTCGCTTAAT          | GTTATGCGCTTGCGAACCT            |
| <i>XBPIs</i>       | CCGCAGCAGGTGCAGG               | GAGTCAATACCGCCAGAATCCA         |
| <i>TF</i>          | GCCAGGAGAAAGGGGAAT             | CAGTGCAATATAGCATTTGCAGTAGC     |
| <i>VEGFR</i>       | GAGGAGCAGTTACGGTCTGTG          | TCCTTTCCTTAGCTGACACTTGT        |
| <i>β-Actin</i>     | TCACCCACACTGTGCCCATCTACGA      | CAGCGGAACCGCTCATTGCCAATGG      |
| <i>18S</i>         | GGCCCTGTAATTGGAATGAGTC         | CCAAGATCCAACACTACGAGCTT        |

J
